# Supplementary material
Source: PubMed Central journal article supplement (PMC3567274)
Supplement: mmc1.pdf [file mmc1.pdf]

American Journal of Human Genetics, Volume 92

## **Supplemental Information**

### **Identification of Mutations in *SLC24A4*, Encoding a Potassium-Dependent Sodium/Calcium Exchanger, as a Cause of Amelogenesis Imperfecta**

**David A. Parry, James A. Poulter, Clare V. Logan, Steven J. Brookes,  
Hussain Jafri<sup>1</sup>, Christopher H. Ferguson, Babra M. Anwari, Yasmin Rashid,  
Haiqing Zhao, Colin A. Johnson, Chris F. Inglehearn, and Alan J. Mighell**

## **Supplemental Inventory**

### **Supplemental Figures and Tables**

Figure S1

Figure S2

Table S1

Table S2





| Region                                          | Length (Mb) | RefSeq Coding Exons in Region | Variants Passing Filters | ...and not in dbSNP129 or MAF < 1% | ...or 10 Ethnically Matched In-House Exomes | ...and Functional |
|-------------------------------------------------|-------------|-------------------------------|--------------------------|------------------------------------|---------------------------------------------|-------------------|
| chr6:163023850-168394923 (rs7756486;rs3752611)  | 5.37        | 187 (28 Kb)                   | 296                      | 39                                 | 26                                          | 0                 |
| chr14:90556897-96655642 (rs12880982;rs12436690) | 6.10        | 544 (100 Kb)                  | 535                      | 65                                 | 49                                          | 2                 |
| chr16:71591014-73454749 (rs7200212;rs12447968)  | 1.86        | 179 (41 Kb)                   | 141                      | 15                                 | 6                                           | 0                 |
| chr17:55361975-57267940 (rs2531899;rs12602103)  | 1.90        | 268 (45 Kb)                   | 161                      | 21                                 | 18                                          | 1                 |
| chr17:59852249-60558723 (rs4078306;rs414341)    | 0.71        | 116 (19 Kb)                   | 30                       | 4                                  | 3                                           | 0                 |
| <b>Total</b>                                    | 15.95       | 1294 (232 Kb)                 | 1163                     | 144                                | 102                                         | 3                 |

**Table S1. Summary of Variants AI-112 Candidate Disease Regions and Variants Discovered by Exome Sequencing**

The total variants identified in each region are shown. “Functional” variants are defined as coding non-synonymous variants, exonic insertions or deletions, or variants at splice consensus sites.

| Exon | Forward                  | Reverse              |
|------|--------------------------|----------------------|
| 3    | ctcgccactgattgcac        | aaggaggggaaaacatctcg |
| 4    | cagggtgttgctgacatag      | tggctgaaccaccacata   |
| 5    | gaactctcagaagtcaagtgaggt | agatctcagacacgccacg  |
| 6    | ctggttggggtgtggtg        | ctcgggtgacagctcttgc  |
| 7    | ttggctgtagagcgtccagt     | tgaggctcagagctgacaaa |
| 8    | aaagggggacactgaggaag     | gctacccaacctcttgc    |
| 9    | gtggcctggagtaggaggt      | agtgccaggggcagagat   |
| 10   | gagcagctcagaaatggacc     | aacgattcaggaacccaac  |
| 11   | cacttctggaccctcattc      | ttctccctgctgtcAAAA   |
| 12   | agggatggggtgtgatcc       | tctcttagggcacctgtggt |
| 13   | tcacaaggtgaggggaagtc     | atcaatggcaccaggaagag |
| 14   | tcccaggggtgtgttcta       | acagattcgctcctaagca  |
| 15   | ctagagtacatcggtgga       | gtggttagccttgaaccag  |
| 16   | tgttctacgcttacagtgtctc   | aagtcaggcaggacgag    |
| 17   | ttccaaggaatggcactgat     | tagagcctctggctggaact |
| 18   | gctgggattctggatgga       | gtaagtgacgaggcggaatc |
| 19   | tgaggatcagactgcagcac     | gcctatgcaggagagacctg |

**Table S2. SLC24A4 Primer Pairs**

Primer sequences used to amplify and sequence coding exons of *SLC24A4* (RefSeq transcripts NM\_153646.3, NM\_153647.3 and NM\_153648.3).
